# Supplementary material
Source: Elsevier journal article supplement (https://www.sciencedirect.com/science/article/pii/S0212656721001529)
Supplement: mmc1 [file S0212656721001529:mmc1.docx]

**APPENDIX. Criteria used to identify pre-existing conditions/comorbidities in the study population.**

| Comorbidities with ICD-10 codes [International Classification of Diseases, 10th Revision] | |
| --- | --- |
| **Neurological disease:**  Dementia  Ictus | F01-F03  I63, I61 |
| **Chronic renal failure** | N18-N19 |
| **Cancer** (solid organ or haematological neoplasia) in past 5 years | C00-C97 |
| **Rheumatologic disease:**  Rheumatoid arthritis, enteropathic arthropathies and juvenile arthritis  Systemic lupus erythematosus | M05-M09  M32 |
| **Chronic pulmonary/respiratory disease:**  Chronic bronchitis/emphysema  Asthma  Other chronic pulmonary diseases | J41-J44  J45-J46  P27, E84, J47 |
| **Chronic heart disease:**  Congestive heart failure  Coronary artery disease  Other chronic heart diseases | I50  I20-I22, I25  I05-I08, I11,I35-I37,I42, I51.7 |
| **Atrial Fibrillation** | I48 |
| **Chronic liver disease:**  Chronic viral hepatitis  Cirrhosis  Alcoholic hepatitis | B18  K74  K70 |
| **Diabetes mellitus** | E10-E14 |
| **Hypertension** | I10, I11, I12 o I15 |
| **Hypercholesterolemia** | E78 |
| **Obesity** | E66 |
| **Smoking** | F17 |

**Supplementary Table S1. Multivariable Cox regression models assessing risk of suffering a critical outcome (ICU-admission or death) among the 282 COVID-19 study subjects.**

| **Variable** | **Model 1** | **Model 2** |
| --- | --- | --- |
| **HR (95% CI) p-value** | **HR (95% CI) p-value** |
| Age: 50-64 yrs  65-79 yrs  ≥80 yrs | 1.00 (reference) 0.012  2.26 (1.28-2.59) 0.008  2.58 (1.40-6.45) 0.005 | Age, continuous yrs  1.02 (1.00-1.05) 0.038 |
| Dyspnea | 3.00 (1.69-5.33) <0.001 | 3.22 (1.82-5.72) <0.001 |
| Confusion | 2.80 (1.40-6.45) 0.003 | 2.80 (1.40-5.60) 0.004 |
| Myalgias | 0.34 (0.11-1.02) 0.055 | 0.26 (0.09-0.76) 0.013 |
